# Supplementary material for: Shared but Clean Household Toilets: What Makes This Possible? Evidence from Ghana and Kenya
Source: MDPI journal article supplement (doi:10.3390/ijerph19074271), 2022-04-02
Supplement: s1 [file s1]

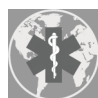

# Shared but Clean Household Toilets: What Makes This Possible? Evidence from Ghana and Kenya

## Supplementary Materials

**Table S1.** Indicators of quality of shared sanitation facility.

| Quality indicators                                   | Scale          | Ghana              |               | Kenya              |               |
|------------------------------------------------------|----------------|--------------------|---------------|--------------------|---------------|
| Hygiene                                              |                | Yes<br>[n (%)]     | No<br>[n (%)] | Yes<br>[n (%)]     | No<br>[n (%)] |
| Is there faecal matter on the slab/seat?             | Yes = 0 No = 1 | 49 (12)            | 362 (88)      | 76 (17)            | 362 (83)      |
| Are there flies on the facility                      | Yes = 0 No = 1 | 101 (25)           | 310 (75)      | 407 (93)           | 31 (7)        |
| Is there a noticeable odour on the facility?         | Yes = 0 No = 1 | 137 (33)           | 274 (67)      | 410 (94)           | 28 (6)        |
| Is there urine/saliva on the facility?               | Yes = 0 No = 1 | 25 (6)             | 386 (94)      | 216 (49)           | 222 (51)      |
| Are there maggots in the privy room of the facility? | Yes = 0 No = 1 | 29 (7)             | 382 (93)      | 28 (6)             | 410 (94)      |
| Are there rodents on the facility?                   | Yes = 0 No = 1 | 25 (6)             | 386 (94)      | 22 (5)             | 416 (95)      |
| Hygiene score<br>[Median (95%CI)]                    |                | 6<br>(4.99 – 5.23) |               | 3<br>(2.54 – 2.73) |               |
| Privacy                                              |                |                    |               |                    |               |
| Does the toilet facility have a door?                | Yes = 1 No = 0 | 393 (96)           | 18 (4)        | 397 (91.7)         | 36 (8.3)      |
| Does the door have a locking latch on the inside?    | Yes = 1 No = 0 | 319 (78)           | 92 (22)       | 198 (45.7)         | 235 (54.3)    |
| Does the door have a locking latch on the outside?   | Yes = 1 No = 0 | 376 (91)           | 35 (9)        | 334 (77.1)         | 99 (22.9)     |
| Does the door offer privacy?                         | Yes = 1 No = 0 | 343 (83)           | 68 (17)       | 376 (86.8)         | 57 (13.2)     |
| Does the super-structure offer privacy?              | Yes = 1 No = 0 | 340 (83)           | 70 (17)       | 329 (76.5)         | 101 (23.5)    |
| Privacy score<br>[Median (95%CI)]                    |                | 5<br>(4.20 – 4.42) |               | 4<br>(3.65 – 3.90) |               |
| Accessibility                                        |                |                    |               |                    |               |
| Does everyone in the house use the toilet facility?  | Yes = 1 No = 0 | 398 (97)           | 13 (3)        | 390 (90.7)         | 40 (9.3)      |
| Is the toilet facility accessible at all times?      | Yes = 1 No = 0 | 407 (99)           | 3 (1)         | 330 (76.6)         | 101 (23.4)    |
| Accessibility score<br>[Median (95%CI)]              |                | 2<br>(1.94 – 1.98) |               | 2<br>(1.62 – 1.72) |               |

**Table S2.** Predictors of total quality of shared sanitation.

| <b>Predictors</b>                               | <b><math>\beta</math></b> | <b>OR</b> | <b>SE</b> | <b>P (95% CI)</b>      |
|-------------------------------------------------|---------------------------|-----------|-----------|------------------------|
| Presence of functional out-side door lock       | 1.71                      | 5.53      | 0.19      | <0.05<br>(1.34–2.08)** |
| Type of sanitation facility                     | 2.04                      | 7.69      | 0.15      | <0.05<br>(1.74–2.34)** |
| Cleaning toilet daily                           | 0.28                      | 1.32      | 0.15      | 0.06<br>(-0.02– 0.57)  |
| Involving landlords in cleaning toilet facility | -0.11                     | 0.90      | 0.23      | 0.61<br>(-0.56 – 0.33) |
| Presence of landlord                            | 1.14                      | 3.13      | 0.14      | <0.05<br>(0.85–1.41)** |
| Number of households sharing toilet facility    | 0.001                     | 1.00      | 0.01      | 0.94<br>(-0.03–0.03)   |
| R-squared                                       |                           |           | 0.36      |                        |

\*\* statistically significant predictor of the overall quality of shared sanitation.
